# Supplementary material for: Mesoporous tantalum phosphates: preparation, acidity and catalytic performance for xylose dehydration to produce furfural
Source: Royal Society of Chemistry journal article supplement (doi:10.1039/c6ra07830c), 2016-01-01
Supplement: c6ra07830c1.pdf [file c6ra07830c1.pdf]

## Supporting Information

### **Mesoporous Tantalum Phosphates: Preparation, Acidity and Catalytic Performance for Xylose Dehydration to Produce Furfural**

Yanran Xing, Bo Yan, Zifei Yuan, Keqiang Sun\*

Innovative Catalysis Program, Key Lab of Organic Optoelectronics & Molecular Engineering, Department of Chemistry, Tsinghua University, Beijing, 100084, China

*E-mail:* kqsun@mail.tsinghua.edu.cn

Tel: +86-10-62772592; Fax: +86-10-62771149

**Table S1.** Comparison of the reaction rates between different catalyst systems during the production of furfural at different reaction conditions.

| Catalyst                                         | Temp.( °C) | Time  | Rxn rate <sup>b</sup><br>(mmol h <sup>-1</sup> m <sup>-2</sup> ) | Solvent       | Ref |
|--------------------------------------------------|------------|-------|------------------------------------------------------------------|---------------|-----|
| Zr-P                                             | 160        | 15min | 0.225                                                            | Water         | 19  |
| SiO <sub>2</sub> -Al <sub>2</sub> O <sub>3</sub> | 160        | 15min | 0.031                                                            | Water         | 19  |
| HY zeolite                                       | 160        | 15min | 0.080                                                            | Water         | 19  |
| WO <sub>x</sub> /ZrO <sub>2</sub>                | 160        | 15min | 0.252                                                            | Water         | 19  |
| γ-Al <sub>2</sub> O <sub>3</sub>                 | 160        | 15min | 0.170                                                            | Water         | 19  |
| MCM-Nb                                           | 170        | 20min | 0.014                                                            | Water/toluene | 15  |
| TA-p-300                                         | 160        | 30min | 0.070                                                            | Water/butanol | 24  |

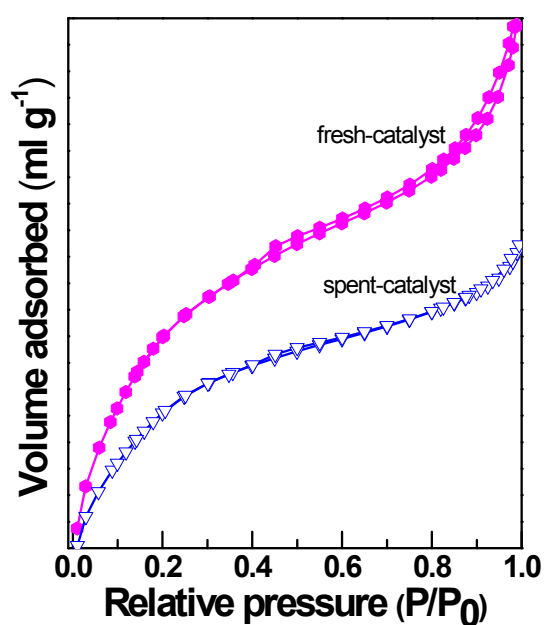

**Figure S1.** N<sub>2</sub> adsorption-desorption isotherms of the fresh TaOPO<sub>4</sub>-0.84 sample and spent TaOPO<sub>4</sub>-0.84 sample.

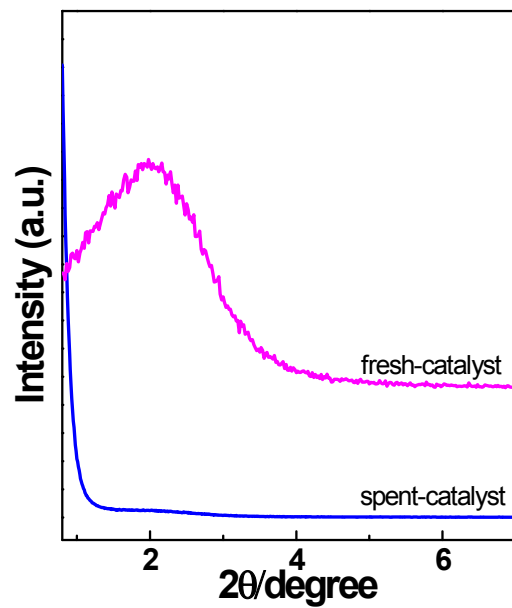

**Figure S2.** Small-angle XRD patterns for the fresh TaOPO<sub>4</sub>-0.84 sample and spent TaOPO<sub>4</sub>-0.84 sample.

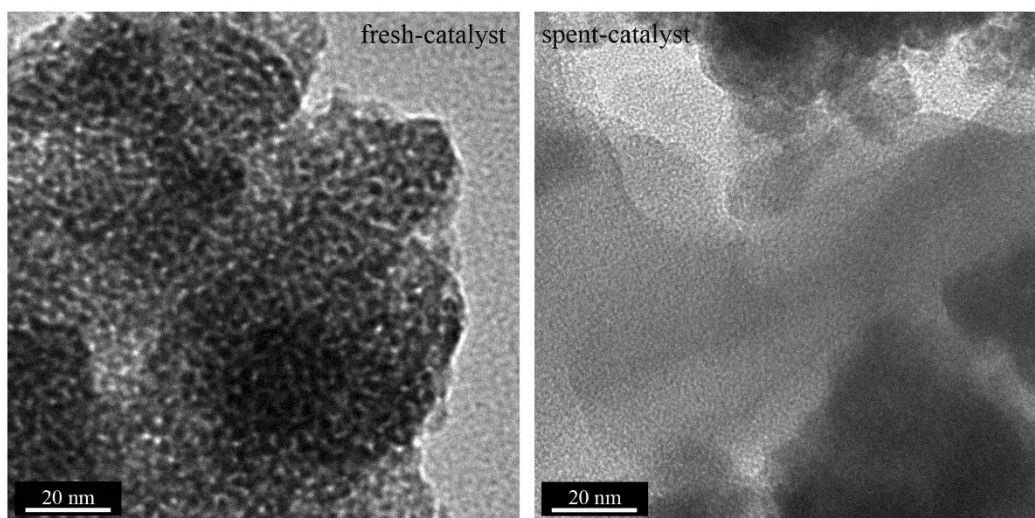

**Figure S3.** TEM images of the fresh TaOPO<sub>4</sub>-0.84 sample and spent TaOPO<sub>4</sub>-0.84 sample.

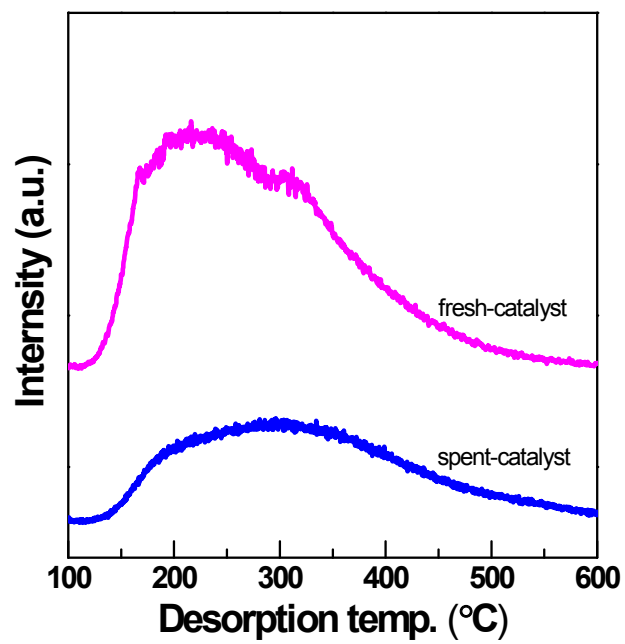

**Figure S4.** NH<sub>3</sub>-TPD profiles for the fresh TaOPO<sub>4</sub>-0.84 sample and spent TaOPO<sub>4</sub>-0.84 sample.
